# Fulvestrant-Induced Cell Death and Proteasomal Degradation of Estrogen Receptor $\alpha$ Protein in MCF-7 Cells Require the CSK c-Src Tyrosine Kinase

Wei-Lan Yeh, Keiko Shioda, Kathryn R. Coser, Danielle Rivizzigno, Kristen R. McSweeney, Toshi Shioda\*

Center for Cancer Research, Massachusetts General Hospital Cancer Center and Harvard Medical School, Charlestown, Massachusetts, United States of America

## Abstract

Fulvestrant is a representative pure antiestrogen and a Selective Estrogen Receptor Down-regulator (SERD). In contrast to the Selective Estrogen Receptor Modulators (SERMs) such as 4-hydroxytamoxifen that bind to estrogen receptor  $\alpha$  (ER $\alpha$ ) as antagonists or partial agonists, fulvestrant causes proteasomal degradation of ER $\alpha$  protein, shutting down the estrogen signaling to induce proliferation arrest and apoptosis of estrogen-dependent breast cancer cells. We performed genome-wide RNAi knockdown screenings for protein kinases required for fulvestrant-induced apoptosis of the MCF-7 estrogen-dependent human breast cancer cells and identified the c-Src tyrosine kinase (CSK), a negative regulator of the oncoprotein c-Src and related protein tyrosine kinases, as one of the necessary molecules. Whereas RNAi knockdown of CSK in MCF-7 cells by shRNA-expressing lentiviruses strongly suppressed fulvestrant-induced cell death, CSK knockdown did not affect cytotoxic actions of 4-hydroxytamoxifen or paclitaxel, a chemotherapeutic agent. In the absence of CSK, fulvestrant-induced proteasomal degradation of ER $\alpha$  protein was suppressed in both MCF-7 and T47D estrogen-dependent breast cancer cells whereas the TP53-mutated T47D cells were resistant to the cytotoxic action of fulvestrant in the presence or absence of CSK. MCF-7 cell sensitivities to fulvestrant-induced cell death or ER $\alpha$  protein degradation was not affected by small-molecular-weight inhibitors of the tyrosine kinase activity of c-Src, suggesting possible involvement of other signaling molecules in CSK-dependent MCF-7 cell death induced by fulvestrant. Our observations suggest the importance of CSK in the determination of cellular sensitivity to the cytotoxic action of fulvestrant.

**Citation:** Yeh W-L, Shioda K, Coser KR, Rivizzigno D, McSweeney KR, et al. (2013) Fulvestrant-Induced Cell Death and Proteasomal Degradation of Estrogen Receptor  $\alpha$  Protein in MCF-7 Cells Require the CSK c-Src Tyrosine Kinase. PLoS ONE 8(4): e60889. doi:10.1371/journal.pone.0060889

**Editor:** Antimo Migliaccio, II Università di Napoli, Italy

**Received:** March 6, 2012; **Accepted:** March 6, 2013; **Published:** April 4, 2013

**Copyright:** © 2013 Yeh et al. This is an open-access article distributed under the terms of the Creative Commons Attribution License, which permits unrestricted use, distribution, and reproduction in any medium, provided the original author and source are credited.

**Funding:** This research was supported by Susan G. Komen for Cure grants FAS0703860 and KG090515, and AstraZeneca Preclinical Study Support IRUSFULV0066, awarded to T. Shioda. The funders had no role in study design, data collection and analysis, decision to publish, or preparation of the manuscript.

**Competing Interests:** The authors have declared that no competing interests exist.

\* E-mail: tshioda@partners.org

## Introduction

Approximately 70% of breast cancers express estrogen receptor  $\alpha$  (ER $\alpha$ ), and most of these ER $\alpha$ -positive primary tumors depend on estrogen signaling for their growth and survival [1]. Endocrine therapy aims to shut off estrogen signaling in ER $\alpha$ -positive breast cancer cells to halt cell proliferation and/or to induce cell death [2–7]. Two types of antiestrogens with distinct mechanisms of actions have been used for this purpose: Selective Estrogen Receptor Modulators (SERMs) and the Selective Estrogen Receptor Down-regulators (SERDs). The SERMs, represented by tamoxifen or raloxifene, bind to ER $\alpha$  as partial agonist or antagonists in a manner dependent on target tissues [8–10]. On the other hand, the SERDs, represented by fulvestrant, bind to ER $\alpha$  and induce rapid proteasomal degradation of ER $\alpha$  protein [11]. Unfortunately, the benefit of endocrine therapy is seriously limited by resistance of tumors against antiestrogens [12], and a large number of studies have proposed molecular mechanisms behind the endocrine therapy resistance of human breast cancer cells. When activated by agonistic ligands, ER $\alpha$  functions as a transcription factor and affects expression of thousands of genes in human breast cancer cells [13–15]. In addition, ER $\alpha$  initiates rapid intracellular signaling [16] through phosphorylation of membrane receptor kinases, including insulin-like growth factor I

receptor (IGF-IR) [17], epidermal growth factor receptor (EGFR) [18], and HER2/ERBB2 [19]. ER $\alpha$  also interacts with other signaling kinases and adaptor molecules such as c-Src [20], Shc [21], PAK1 [22], DLC1 [23,24], PELP1/MNAR [22,25,26], and p85 PI3-kinase regulatory subunit [27]. These interactions lead to activation of downstream signaling kinases such as the p42/44 MAPK and AKT [28], which play critical roles in regulating cell proliferation and survival. Some of these ER $\alpha$ -activated protein kinases (e.g., c-Src, PAK1, MAPK, and AKT) phosphorylate ER $\alpha$  to enhance the genomic actions of ER $\alpha$ . Roles of another network of signaling pathway involving STAT1, interferon regulatory factor 1, NF- $\kappa$ B, and their downstream effectors (e.g., caspases and BCL2 family apoptosis regulators) are also becoming increasingly evident [29]. Thus, a large body of evidence supports the notion that a highly complex signaling network is involved in the mechanism of estrogen actions and possibly the endocrine therapy resistance of ER $\alpha$ -positive breast cancer cells.

To identify novel components in the signaling network leading to endocrine therapy resistance, functional screening studies using the RNAi knockdown technique have been performed by several laboratories. For example, Iorns et al. [30] transfected MCF-7 human breast cancer cells with an arrayed library of siRNA oligonucleotides that targeted 779 human kinases and phospho-

tases. By exposing cells to tamoxifen and identifying drug-resistant clones, they identified three protein kinases (CDK10, CRK7, and MAP2K7) required for tamoxifen-induced cell death. Taking a similar approach of Iorns et al., in the present study we performed lentivirus-based RNAi knockdown screening experiments covering the entire human kinases and phosphatases and identified CSK (c-Src tyrosine kinase) as a novel signaling molecule required for fulvestrant-induced MCF-7 cell death. Whereas RNAi knockdown of CSK caused significant resistance to fulvestrant, it did not affect sensitivities to either tamoxifen or paclitaxel. We provide evidence that this strong specificity of fulvestrant resistance caused by CSK knockdown was due to suppression of the fulvestrant-induced proteasomal degradation of ER $\alpha$  protein, which is not involved in the mechanisms of actions of tamoxifen or paclitaxel. Our present study provides important insights into the molecular mechanisms of the cytotoxic action of fulvestrant in human breast cancer cells, providing evidence of requirement of CSK.

**Results**

**RNAi knockdown of the c-Src Tyrosine Kinase (CSK) caused resistance of MCF-7 cells to fulvestrant**

Our prior studies revealed the critical importance of BIK (a BH3-only family pro-apoptotic protein) and TP53 (a tumor suppressor transcription factor necessary for transcriptional induction of the BIK mRNA transcripts) in fulvestrant-induced apoptosis of MCF-7 cells [31,32]. To obtain further insights into the mechanism of fulvestrant actions, we performed RNAi knockdown screenings to identify additional molecules required for fulvestrant-induced MCF-7 cell apoptosis. MCF-7 cells grown in 384-well plates were infected with a library of arrayed lentiviruses expressing shRNA species targeting the entire RefSeq collection of know human protein kinases and phosphatases consisting of 6,560 lentivirus clones [33,34]. Cells were then exposed to 100 nM fulvestrant for 7 days, and surviving cells were visualized by crystal violet staining. These screenings revealed that RNAi knockdown of MAP2K7 or CSK (c-Src tyrosine kinase, NCBI gene ID=1445) strongly suppress fulvestrant-induced MCF-7 cell death (Fig. 1A for CSK data; MAP2K7 data not shown). Since a similar RNAi knockdown project by Iorns et al. already identified MAP2K7 and several other kinases including CDK10 as Ser/Thr kinases required for tamoxifen sensitivity of MCF-7 cells, we focused on the roles of CSK in the cytotoxic action of fulvestrant on MCF-7 cells.

RNAi knockdown of two independent shRNA lentivirus clones targeting human CSK [The RNAi Consortium Clone ID = TRCN0000199018 (target sequence, 5'-CCACTAAGTCT-GACGTGTGGA, is in the CSK coding sequence) and TRCN0000199031 (target sequence, 5'-CCGTCTCTCTTGGACCCACCT, is in the 3'-UTR of the CSK mRNA transcripts); hereafter referred to as shRNA #1 and #2, respectively] confirmed the requirement of CSK for the cytotoxic action of fulvestrant in MCF-7 cells. When cells were infected with these shRNA lentiviruses at MOI = 4~8 and selected by puromycin resistance for 48 hours, we observed about 65%–75% reduction in CSK protein expression (Fig. 1B). The CSK RNAi knockdown was stable in the infected cells for at least five passages, within which all experiments in the present study were performed. Exposure of cells to 100 nM fulvestrant for 7 days induced massive cell death in mock-infected cells and cells infected with the pLKO.1 empty lentiviral vector resulted in only 8.1±0.3% and 8.5±0.6% surviving cells, respectively (Fig 1C and Fig. S1). In contrast, MCF-7 cells infected cells the CSK shRNA lentiviruses showed significant resistance to fulvestrant-

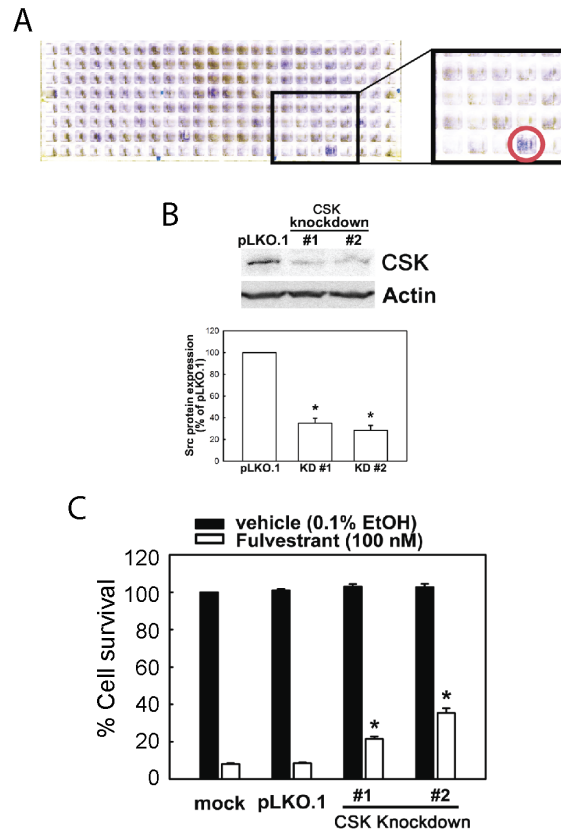

**Figure 1. RNAi knockdown of CSK in MCF-7 cells causes resistance to fulvestrant.** (A) RNAi knockdown screening reveals dependence of fulvestrant-induced MCF-7 cell death on CSK. Cells infected with lentiviruses expressing shRNA to CSK (well is identified by red circle) survived after 7 days of exposure to 100 nM fulvestrant. Crystal violet staining of a representative screening plate is shown. (B) Knockdown of CSK protein expression by shRNA lentiviruses. Cells were infected with empty lentivirus vector (pLKO.1) or two independent clones of lentiviruses expressing different shRNA species targeting CSK shown in Figure 1 (CSK KD#1 and #2) and subjected to Western blotting quantitation of CSK protein expression (top). Intensities of CSK protein bands were determined by densitometry as shown in the bar graph (bottom, mean±SEM of three independent experiments. Asterisk indicates statistical significance, p<0.05). (C) Infection by lentiviruses expressing shRNA targeting CSK causes fulvestrant resistance of MCF-7 cells. Cells were infected with empty lentivirus vector (pLKO.1) or two independent clones of lentiviruses expressing different shRNA species targeting CSK (CSK KD #1 and #2) and exposed to fulvestrant, or vehicle for 7 days. % Cell survival (mean±SEM) was determined by three independent experiments. \*, p<0.001 to both mock infected and pLKO.1-infected controls exposed to fulvestrant). No significant changes were observed with cell survival ratio of any virus-infected cells compared to mock infected control. doi:10.1371/journal.pone.0060889.g001

induced death, with 21.5±1.3% and 35.3±2.7% surviving cells after exposure to shRNA #1 and #2, respectively.

To determine whether the CSK knockdown efficiency correlates with the strength of fulvestrant resistance, MCF-7 cells were infected with a 10-clone panel of shRNA lentiviruses (Table S1), and their fulvestrant-induced cell death was examined (Fig. S2). Effective RNAi knockdown of CSK was observed with four shRNA lentiviral clones whereas three clones as well as pLKO.1 control clones failed RNAi knockdown. Fulvestrant resistance was observed with the four shRNA lentiviral clones that effectively knocked down CSK whereas cells infected with the failed lentiviral

clones or the pLKO.1 empty viral vector control were completely killed after 7-day exposure to 100 nM fulvestrant. These results indicate that CSK is required for fulvestrant-induced MCF-7 cell death.

**RNAi knockdown of CSK does not affect MCF-7 cell sensitivity to either tamoxifen or paclitaxel**

Two different types of antiestrogens are presently used for endocrine therapy of breast cancer—namely, the SERDs (represented by fulvestrant) and the SERMs (represented by tamoxifen). Cross-resistance of breast cancer cells to these distinct types of drugs is often observed, in both clinical and cell culture settings [35–37]. To examine whether CSK is required for the cytotoxic effects of tamoxifen, MCF-7 cells were exposed to 4-hydroxytamoxifen (4-OHT), which is the biologically active metabolite of tamoxifen [38]. A 10-day exposure to 1 μM 4-OHT caused significant MCF-7 cell death although its cytotoxic effect was weaker than that of fulvestrant (Figs. 2A and S3A), in agreement with previous studies [39,40]. To our surprise, RNAi knockdown of CSK did not affect the tamoxifen effect at all. These results indicate that CSK is specifically required for fulvestrant (SERD)-induced MCF-7 cell death while it is dispensable for the cytotoxic action of tamoxifen (SERM).

To further characterize the specificity of the CSK requirement for drug-induced MCF-7 cell death, we examined the effects of RNAi knockdown of CSK on MCF-7 cell sensitivity to paclitaxel, a widely used chemotherapeutic drug that inhibits dissociation of microtubule polymers [41]. A 2-day exposure of MCF-7 cells to varying concentrations of paclitaxel (1–1000 nM) caused massive cell death in a dose-dependent manner (Figs. 2B and 3SB). However, RNAi knockdown of CSK failed to affect the cytotoxic effects of paclitaxel. Thus, the drug resistance of MCF-7 cells infected with shRNA lentiviruses targeting CSK was highly specific for fulvestrant.

**CSK is required for fulvestrant-induced ERα protein degradation in estrogen-dependent human breast cancer cells**

Fulvestrant causes proteasomal degradation of ERα protein in breast cancer cells [11,31,35]. High concentrations of 17β-estradiol (E2), a physiological ligand of ER, also causes proteasomal degradation of liganded ERα protein [42–44]. Since strong genetic and phenotypic heterogeneity, including sensitivity to antiestrogens, has been shown to occur in MCF-7 cell cultures maintained in different institutions and cell resource repositories [45–50], we first attempted to confirm that both fulvestrant and E2 cause proteasome-dependent degradation of ERα protein. When MCF-7 cells were exposed to 100 nM fulvestrant, expression of ERα protein was reduced in a time-dependent manner (Fig. 3A, 3C). Similarly, exposure of hormone-starved MCF-7 cells to 100 nM E2 caused time-dependent reduction in ERα protein expression (Fig. 3B, 3C). Under our experimental conditions, the time-dependent reduction in ERα protein caused by exposure to fulvestrant and E2 were comparable, with only 35% of ERα protein remained after 6 hours of exposure (Fig. 3C). It is important to emphasize that the E2-induced reduction in ERα protein expression was observed only at the highest concentration of the ligand tested (100 nM; Fig. 3D). In contrast, E2-stimulated proliferation of MCF-7 cells at only 100 pM [13]. The observed reduction in ERα protein expression after exposure to both fulvestrant and E2 did not occur when cells were pre-exposed to MG132, a wide-spectrum proteasome inhibitor [51] (Figs. 3F–G), confirming the reported proteasome-dependent nature of fulves-

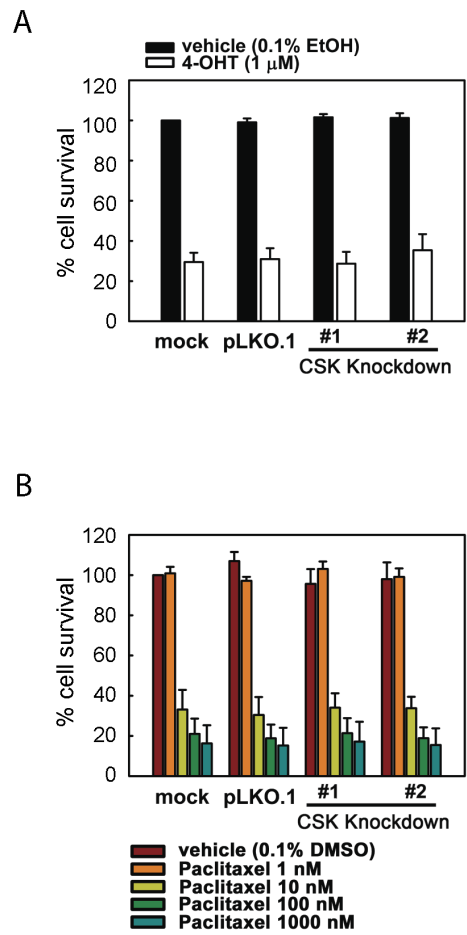

**Figure 2. RNAi knockdown of CSK does not affect MCF-7 cell sensitivity to tamoxifen or paclitaxel.** Cells were infected with empty lentivirus vector (pLKO.1) or two independent clones of lentiviruses expressing different shRNA species targeting CSK shown in Figure 1 (CSK KD#1 and #2) and then exposed to 1 μM 4-hydroxytamoxifen (4-OHT) for 10 days (A) or 1–1000 nM paclitaxel for 2 days (B). Cell viability was determined by crystal violet staining (Fig. S3) and quantified by spectrophotometry (mean±SEM of three or more independent experiments). doi:10.1371/journal.pone.0060889.g002

trant- and E2-induced degradation of ERα protein [52,53]. Exposure to a high concentrations of MG132 (125 nM) caused increase in ERα protein expression to a level even greater than cells not exposed to fulvestrant, suggesting the presence of basal ERα protein turnover (i.e., persistent synthesis and proteasomal degradation) in MCF-7 cells.

Although fulvestrant and tamoxifen are similar in inhibiting estrogen signaling, their mechanisms of actions differ. Whereas fulvestrant cause proteasomal degradation of ERα protein in breast cancer cells [11,31,35], tamoxifen is known to stabilize ERα protein [54,55]. To explain the fulvestrant-specific resistance of the CSK-knockdown MCF-7 cells without affecting their tamoxifen sensitivity, we hypothesized that CSK may be required for fulvestrant-induced proteasomal degradation of ERα protein. To test this hypothesis, we examined time-dependent degradation of ERα protein after exposure to 100 nM fulvestrant in MCF-7 cells infected with pLKO.1 control or CSK shRNA lentiviruses (Fig. 4). Infection with both CSK shRNA lentiviruses #1 and #2 almost completely abolished the fulvestrant-induced ERα protein degradation when examined by Western blotting. However, infection

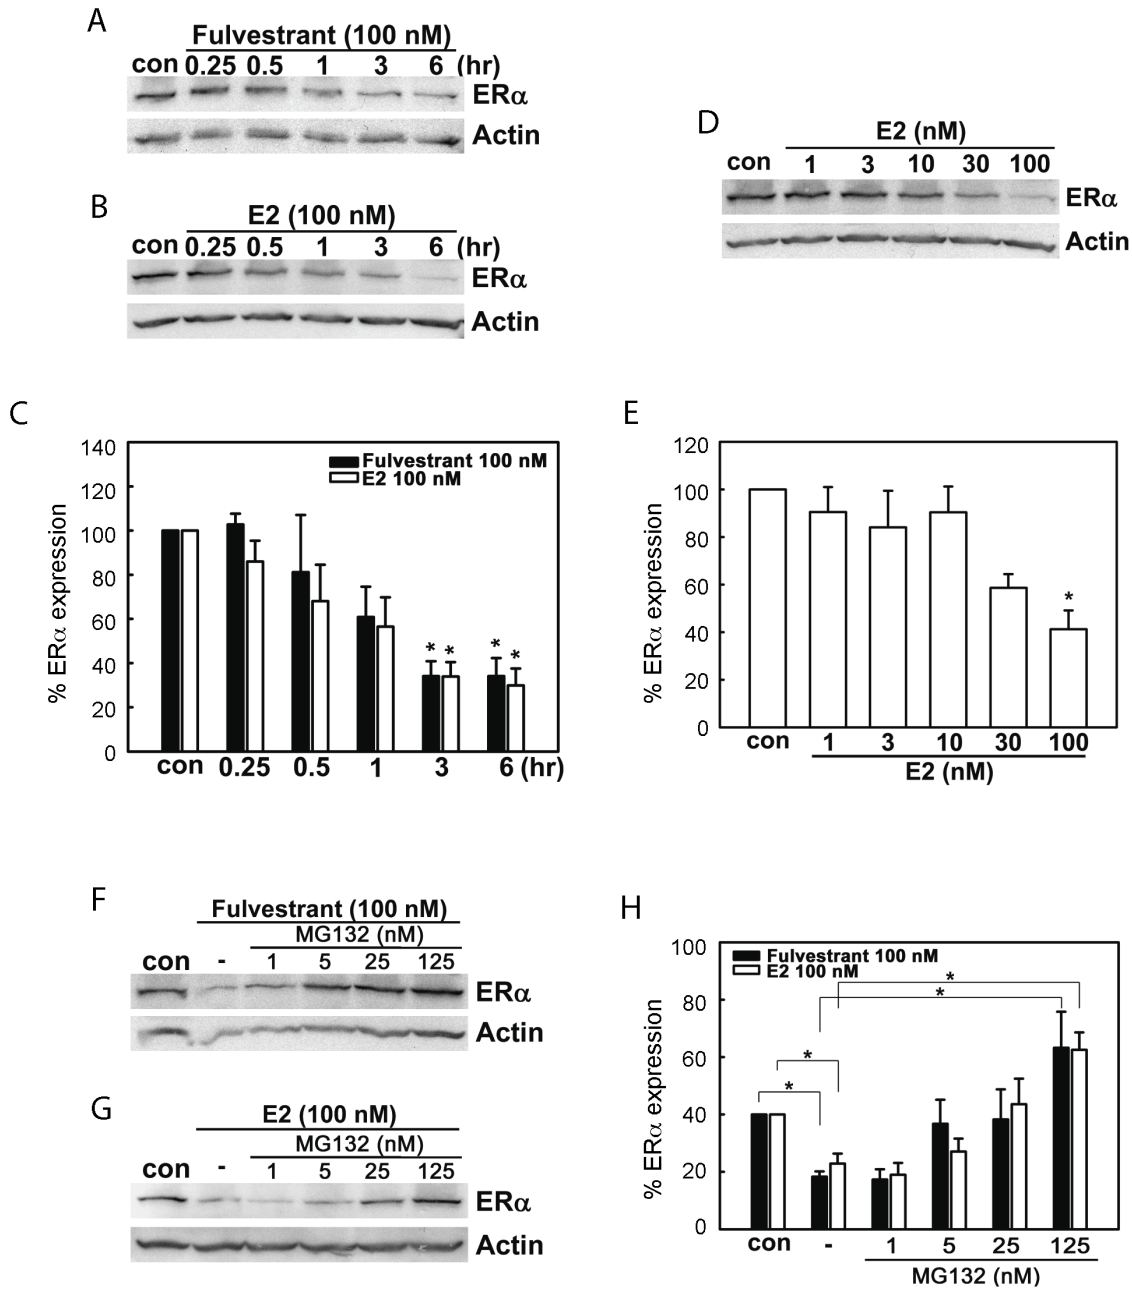

**Figure 3. Both fulvestrant and 17β-estradiol (E2) enhance proteasomal degradation of ERα protein in MCF-7 cells.** (A–C) Fulvestrant (A) and E2 (B) caused time-dependent reduction in ERα protein expression: Western blotting. Intensities of ERα protein bands were determined by densitometry (C, mean±SEM of three independent experiments. Asterisks indicate statistical significance, p<0.05 to vehicle control). (D, E) E2 dose-dependent reduction in ERα protein expression. Cells were exposed to varying concentrations of E2 for 6 hours and subjected to Western blotting analysis of ERα protein (D). Intensities of ERα protein bands were determined by densitometry (E, mean±SEM of three independent experiments. Asterisk indicates t-test significance p<0.05 to vehicle control). (F–H), Pre-exposure to MG132 dose-dependently prevented reduction in ERα protein expression caused by fulvestrant (F) and E2 (G). Con, vehicle control (0.1% ethanol). Cells were exposed to varying concentrations of MG132 for 30 minutes and then exposed additionally to fulvestrant or E2 for 6 hours. Intensities of ERα protein bands were determined by densitometry (H, mean±SEM of three independent experiments. Asterisks indicate statistical significance, p<0.05). doi:10.1371/journal.pone.0060889.g003

with pLKO.1 control virus did not significantly alter the action of fulvestrant effect (Figs. 4A and 4B). To obtain more quantitative ERα protein data, we repeated this experiment but using ELISA (Fig. 4C). After exposure to fulvestrant for 6 hours, ERα protein in pLKO.1-infected control cells was reduced from 37.65±1.64 ng/100 μg total extractable cellular protein to 22.27±0.72 ng/100 μg. On the other hand, ERα expression in cells infected with

CSK shRNA lentiviruses was slightly reduced from 37.45±1.48 ng/100 μg to 30.22±1.75 ng/100 μg (shRNA #1) and 39.55±0.65 ng/100 μg to 31.60±0.77 ng/100 μg (shRNA #2) (Fig. 4C). Thus, agreeing with the Western blotting data, ERα expression determined by ELISA was reduced to 33.6±6.1% of vehicle-exposed control after 6-hour exposure to 100 nM fulvestrant in pLKO.1-infected cells. In contrast, cells infected

with CSK shRNA lentiviruses retained  $79.08 \pm 14.72\%$  (shRNA #1) and  $89.56 \pm 20.44\%$  (shRNA #2) ER $\alpha$  protein expression as compared to vehicle control at under the same conditions. When CSK protein was re-expressed in the cells infected with the CSK shRNA #1 lentivirus by transfection of an expression plasmid, the fulvestrant-induced degradation of ER $\alpha$  protein was partly rescued (Fig. S4). However, re-expression of CSK did not reinstate the fulvestrant-induced MCF-7 cell death (data not shown), presumably due to the transient nature of CSK re-expression from a plasmid vector. Thus, RNAi knockdown of CSK expression strongly suppresses the fulvestrant-induced ER $\alpha$  protein degradation in MCF-7 cells.

To determine whether the suppression of the fulvestrant-induced ER $\alpha$  protein degradation by RNAi knockdown of CSK is also observed in another cell culture model, we repeated the same experiment with T47D human breast cancer cells. Whereas T47D cells are dependent on estrogen for their proliferation, they survive in the absence of estrogen signaling due to the loss-of-function mutation of the p53 tumor suppressor protein [56]. Thus, when T47D cells were exposed to fulvestrant, cells neither proliferated nor died (Fig S5A). Expression of ER $\alpha$  protein in T47D cells infected with the pLKO.1 control lentiviral vector was strongly diminished upon exposure to 100 nM fulvestrant for 3–9 hours (Figs. S5C, S5E), reproducing the observation made with MCF-7 cells (Fig. 2). In contrast, ER $\alpha$  protein was significantly resistant to degradation in fulvestrant-exposed T47D cells infected with the CSK-KD#1 shRNA lentivirus (Figs. S5D, S5E), whose CSK expression was reduced by approximately 70% (data not shown). The resistance was partly reversed by re-expression of CSK from an exogenous vector (Fig. S5E). These results indicate that CSK is required for the fulvestrant-induced ER $\alpha$  protein degradation in T47D cells even though fulvestrant does not show significant cytotoxic action in this cell line.

**Small-molecular-weight inhibitors of c-Src do not affect fulvestrant-induced MCF-7 cell death or ER $\alpha$  protein degradation**

CSK (c-Src tyrosine kinase) is a protein tyrosine kinase that phosphorylates the C-terminal regulatory tyrosine of c-Src oncoprotein, which itself is a protein tyrosine kinase [57]. Phosphorylation by CSK suppresses the kinase activity of c-Src as well as other Src-family tyrosine kinases, and this is a physiological mechanism regulating c-Src activity both in mammals and *Drosophila* [57,58]. Roles of CSK in metastasis of human cancer cells have also been suggested [58]. c-Src directly phosphorylates nuclear hormone receptors such as androgen receptor or ER $\alpha$ , and this phosphorylation is required for steroid hormone signaling [59–61]. Thus, c-Src links signaling initiated by the plasma membrane receptor tyrosine kinases such as epidermal growth factor receptor and steroid hormone signaling [62–64].

To determine whether CSK affects fulvestrant-induced ER $\alpha$  protein degradation through altering c-Src kinase activity, we examined effects of small-molecular-weight inhibitors of c-Src tyrosine kinase on fulvestrant-induced MCF-7 cell death and ER $\alpha$  degradation. PP1 is a relatively specific inhibitor of c-Src although it also inhibits tyrosine kinase activities of c-Kit and Bcr-Abl [65]. AZD0530 (a.k.a. saracatinib) selectively inhibits c-Src and Bcr-Abl kinases [66–69]. We reasoned that, if CSK is required for fulvestrant-induced cell death or ER $\alpha$  protein degradation through suppression of c-Src, inhibition of c-Src tyrosine kinase by chemical inhibitors would pharmacologically mimic CSK activation and show the opposite effect of CSK knockdown—namely, enhanced MCF-7 cell sensitivity to fulvestrant actions. However, by our hands, neither PP1 (0.5–10  $\mu$ M) nor AZD0530 (0.1–2  $\mu$ M)

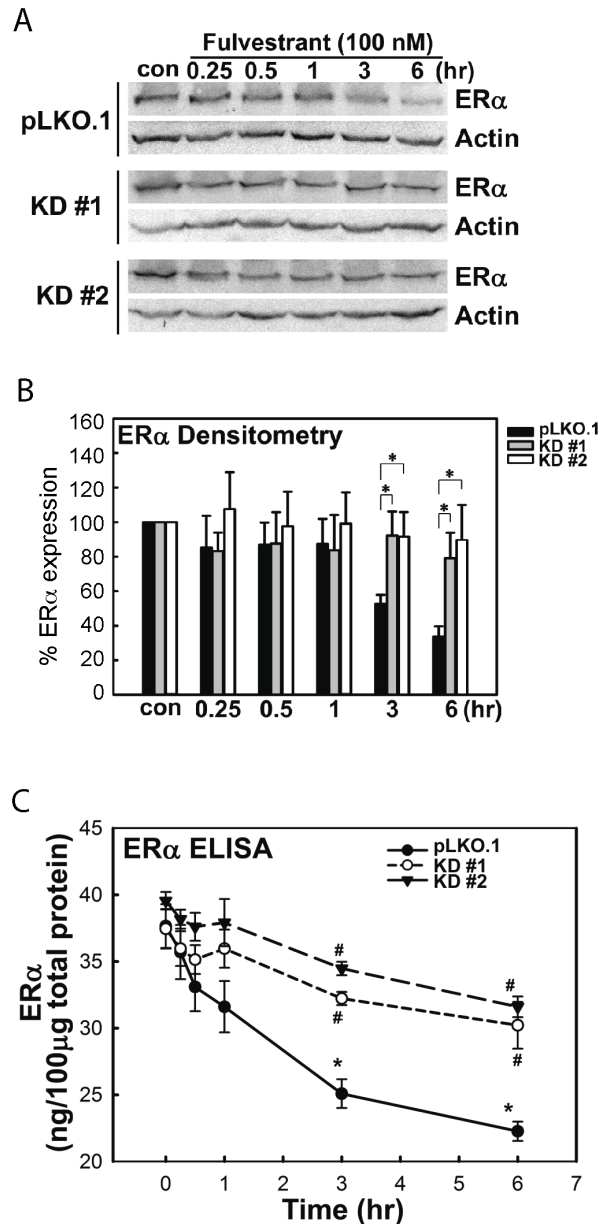

**Figure 4. CSK is required for fulvestrant-induced ER $\alpha$  protein degradation in MCF-7 cells.** (A, B) RNAi knockdown of CSK protein expression caused resistance of intracellular ER $\alpha$  protein to fulvestrant-induced degradation: Western blotting. Cells were infected with control (pLKO.1) or two CSK-knockdown shRNA lentivirus clones and subjected to exposure to fulvestrant. Expression of ER $\alpha$  protein was determined by Western blotting at varying time points of exposure (A). Intensities of ER $\alpha$  protein bands were determined by densitometry (B, mean  $\pm$  SEM of three independent experiments). Asterisk indicates statistical significance,  $p < 0.05$ . (C) Similar experiments as shown in panels (A, B) were performed, but amounts of ER $\alpha$  protein in total cellular protein were determined by ELISA (mean  $\pm$  SEM of three independent experiments; \*,  $p < 0.05$  to vehicle control; #,  $p < 0.05$  to pLKO.1-infected cells exposed to fulvestrant for the same period). doi:10.1371/journal.pone.0060889.g004

significantly affected the fulvestrant-induced MCF-7 cell death (Fig. S6). These c-Src inhibitors did not affect the fulvestrant-induced ER $\alpha$  protein degradation, either (Fig. 5). Repeated experiments with reduced fulvestrant concentrations or shorter exposure times did not reveal any effects of PP1 or AZD0530 (data

not shown). Effective inhibition of c-Src tyrosine kinase activity by these compounds was confirmed by strong suppression of epidermal growth factor-induced phosphorylation of Tyr416, a well-accepted hallmark of c-Src activation [58,70–73] (Fig. S7). Interestingly, c-Src kinase activity was not significantly enhanced in the MCF-7 cells whose CSK expression was suppressed by RNAi knockdown (Fig. S7C), suggesting that c-Src regulation by CSK may have been replaced by other mechanisms.

**Discussion**

Activation of ER $\alpha$  by E2 triggers assembly of an active transcription complex, which in turn signals polyubiquitination and proteasomal degradation of the liganded ER $\alpha$  protein [44,74–80]. Chu *et al.* reported that the E2-triggered proteasomal degradation of ER $\alpha$  protein in MCF-7 cells were enhanced by activation of c-Src [81]. Binding of fulvestrant to ER $\alpha$  also causes proteasomal degradation although it is not associated with transcriptional activation. Because the fulvestrant-triggered ER $\alpha$  protein degradation is 10 times faster than that triggered by E2 in

MCF-7 cells [82], mechanisms of the ER $\alpha$  protein degradation invoked by these two ligands may significantly differ. Our present study provided evidence that CSK, the negative regulator protein tyrosine kinase of c-Src, is required for fulvestrant-triggered ER $\alpha$  protein degradation in MCF-7 cells, which appears to be opposite to the report of Chu *et al.* [81]. However, the apparent lack of c-Src activation in the MCF-7 cells whose CSK expression was stably suppressed by RNAi knockdown (Fig. S7) may suggest that c-Src might be regulated by other mechanisms in the absence of CSK in these cells. Rengifo-Cam *et al.* demonstrated activation of c-Src by 48-hour adenoviral overexpression of a dominant-negative CSK in human colorectal cancer cells [58]. Since our present study was performed using stable CSK-knockdown cultures of MCF-7 cells, transient activation of c-Src, if any, could have been suppressed by compensating mechanisms. Our attempts to suppress the intracellular CSK actions by dominant-negative CSK as reported by Rengifo-Cam *et al.* were unsuccessful due to nonspecific induction of apoptosis of MCF-7 cells, which express

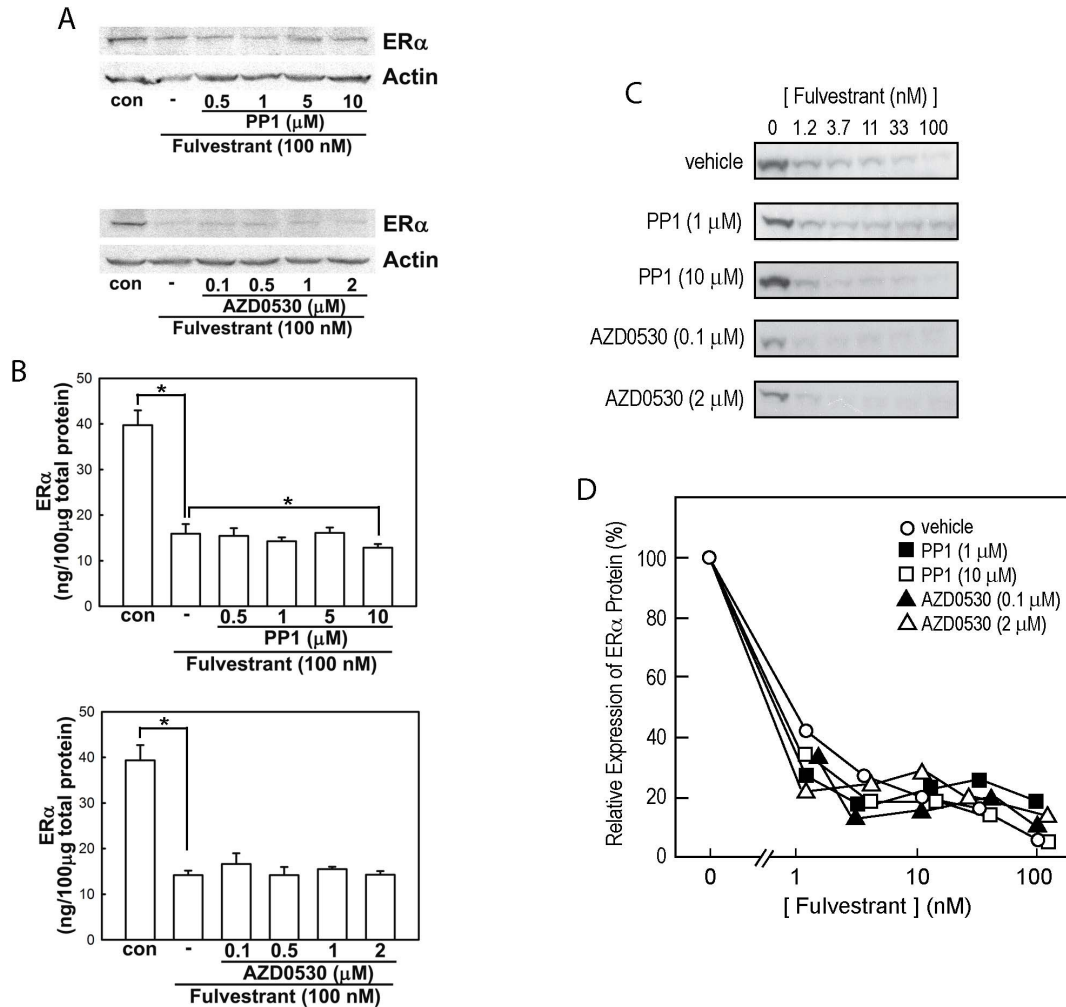

**Figure 5. PP1 or AZD0530 tyrosine kinase inhibitors had no effect on ER $\alpha$  protein degradation in MCF-7 cells.** In panels (A) and (B), ER $\alpha$  protein expression after 6-hour exposure to 100 nM fulvestrant in the presence of PP1 or AZD0530 was determined by Western blotting (A) and ELISA (B, mean  $\pm$  SEM of three or more independent experiments. Asterisks indicate statistical significance,  $p < 0.05$ , to fulvestrant-only group). In panels (C) and (D), fulvestrant concentration was reduced as indicated, and ER $\alpha$  protein expression after 6-hour exposure in the presence of PP1 or AZD0530 was determined by Western blotting (C). Panel (D) shows a typical densitometric quantitation of the ER $\alpha$  protein band. Three independently performed experiments did not show statistically significant effects of PP1 or AZD0530. doi:10.1371/journal.pone.0060889.g005

wild type p53 tumor suppressor protein as the majority of human ER+/PR+/HER2- breast cancers [56,83].

In MCF-7 cells, fulvestrant mobilizes ER $\alpha$  into the nuclear matrix in a manner dependent on interactions between the helix 12 domain of ER $\alpha$  and cytokeratins 8 or 18 [75,84–86]. Mobilization of ER $\alpha$  to nuclear matrix is necessary for poly-ubiquitination of ER $\alpha$  protein by a mechanism involving the NEDD8 ubiquitin-like protein and the Uba3-containing NEDD8-activating enzyme [87] and subsequent degradation by the 26S proteasome [85]. Using a panel of kinase inhibitor/activator chemicals, Marsaud et al. observed that protein kinase C is an enhancer of the fulvestrant-induced proteasomal ER $\alpha$  degradation in MCF-7 cells whereas protein kinase A, MAPKs, and phosphatidylinositol-3-kinase act as suppressors [82]. Tsai et al. also reported that forskolin, a potent activator of protein kinase A, prevents fulvestrant-induced ER $\alpha$  protein degradation in MCF-7 cells [88]. Thus, the signaling involving protein kinases seems to have significant roles in regulating the fulvestrant-induced proteasomal ER $\alpha$  protein degradation in breast cancer cells. Our finding that CSK is required for this fulvestrant action provides additional insights into how the kinase/phosphatase-mediated intracellular signaling network in human breast cancer cells is closely linked to antiestrogen sensitivity.

A number of previous studies including ours [35] isolated fulvestrant-resistant variants of MCF-7 cells after long-term exposure of the polyclonal MCF-7 cell culture to fulvestrant. These studies agree that the fulvestrant resistant variants isolated with this approach did not depend on estrogen signaling because other signaling pathways (e.g., EGF receptor, ERK1/2, c-Met, and AKT [89–92]) supported their proliferation and survival. In these fulvestrant resistant variants, the fulvestrant-induced ER $\alpha$  protein degradation was intact. By siRNA transfection-based RNAi knockdown screenings generating synthetic resistance to tamoxifen, Iorns et al. identified CDK10, CRK7, and MAP2K7 as kinases necessary for tamoxifen sensitivity of MCF-7 cells [30]. Again, knockdown of any of these three kinases caused estrogen insensitivity in MCF-7 cells. Our shRNA lentivirus-based RNAi knockdown screenings generating synthetic resistance to fulvestrant identified MAP2K7 and CSK as kinases necessary for fulvestrant-induced MCF-7 cell death. Independent identification of MAP2K7 as a kinase required for sensitivities of both tamoxifen (Iorns et al. [30]) and fulvestrant (our present study) supports validity of the RNAi knockdown screenings performed in our present study. Since MAP2K7 knockdown did not affect the fulvestrant-induced proteasomal degradation of ER $\alpha$  protein (data not shown), CSK is a unique protein whose knockdown in MCF-7 cells does not cause estrogen insensitivity but leads to drug resistance due to cancellation of the induced ER $\alpha$  protein degradation.

Details of the link between CSK knockdown and cancellation of the fulvestrant-induced proteasomal ER $\alpha$  degradation remain to be determined. Attempts made in our present study did not establish roles of c-Src in the requirement of CSK for the fulvestrant-induced ER $\alpha$  protein degradation although the possible involvement of c-Src in this mechanism cannot be denied. As CSK directly phosphorylates not only c-Src but also the transcription factor [93] and the ATP-activated P2X<sub>3</sub> receptor [94], these non-Src CSK substrates might also be involved in the fulvestrant-induced ER $\alpha$  protein degradation. In this context, it is interesting that phosphorylation of c-Jun at Tyr26 and Tyr170 by CSK causes ubiquitination and proteasomal degradation of the c-Jun protein [93].

In summary, our present study identified CSK as a novel protein tyrosine kinase required for the fulvestrant-induced

proteasomal degradation of ER $\alpha$  protein in MCF-7 cells. RNAi knockdown of CSK caused specific resistance to fulvestrant without affecting MCF-7 cell sensitivities to tamoxifen or paclitaxel, suggesting possible importance of CSK for better understanding of the mechanisms of the cytotoxic action of fulvestrant in human breast cancer cells.

## Materials and Methods

### Chemicals

Fulvestrant (Faslodex<sup>®</sup>/ICI 182,780; research-grade pure chemical) and PP1 were purchased from Tocris (Ellisville, MO). Crystal violet, 4-Hydroxytamoxifen, paclitaxel, and MG132 were from Sigma (St. Louis, MO). Puromycin hydrochloride and 17 $\alpha$ -Estradiol was from Calbiochem (Gibbstown, NJ). AZD0530 was obtained from Selleck Chemicals Co. (Shanghai, China). Recombinant human epidermal growth factor (EGF) was purchased from R&D Systems (Minneapolis, MN).

### Cell Culture

MCF-7 human breast cancer cell culture (BUS stock) was provided by C. Sonnenschein and A. M. Soto (Tufts University) [95,96], and its fulvestrant-sensitive monoclonal subline (W2) was described in our recent study [35]. Our present study was performed using the W2 clone of MCF-7 cells. T47D human breast cancer cells were purchased from ATCC (Manassas, VA). All cells were maintained in Dulbecco's MEM (DMEM) supplemented with 5% FCS (HyClone, DEFINED grade; Thermo Scientific, Waltham, MA) in 10% CO<sub>2</sub> at 37 °C. To examine ER $\alpha$  protein degradation induced by 17 $\alpha$ -estradiol, subconfluent cells were washed three times with phenol red-free DMEM (containing no serum) and incubated in the last wash medium for 60 minutes at 37 °C. Medium was then replaced by phenol red-free DMEM supplemented with 5% charcoal/dextran-stripped FCS (HyClone) and hormone-starved for another 24 hours before exposure to 17 $\alpha$ -estradiol [13].

### shRNA Lentivirus Production and Infection

Lentiviruses expressing shRNA species targeting specific human mRNA transcripts were produced using the pLKO.1 vector harboring the puromycin-resistance marker following published protocols [33]. Subconfluent HEK293T packaging cells grown in 96-well plates were transfected with arrayed, pLKO.1-based shRNA expression plasmids for human kinome screening (6,560 protein kinases and phosphatases) obtained from The RNAi Consortium (Broad Institute, Cambridge, MA) with the expression plasmids for VSV-G surface antigen and the core lentiviral genome. For infection, 5 × 10<sup>3</sup> cells were seeded into wells of 96-well plate and allowed to attach for 24 hours. Cells (5–10 × 10<sup>4</sup> cells/well) were infected with lentiviruses (4 × 10<sup>4</sup> IU; MOI = 4–8) in the presence of 8  $\mu$ g/ml polybrene under 1,200 × g gravity by spinning for 60 minutes. Medium was changed 48 hours after infection, and successful infected cells were selected by puromycin (2.5  $\mu$ g/ml) for 48 hours.

### Cell Viability and Crystal Violet Staining

Cell viability was assessed by crystal violet staining. Cells grown in 96-well plate were washed with PBS twice and then fixed with 12% formaldehyde. After 10 minutes incubation at room temperature, cells were completely dried and stained with 1% crystal violet for 5 minutes. Stained cells were washed with tap water and subjected to spectrophotometric quantitation (OD 590 nm) using SpectraMax M5 (Molecular Devices, Sunnyvale, CA).

## Protein Analyses

Western blotting was performed as we previously described [97]. Briefly, cells were washed with ice cold PBS and lysed with a RIPA buffer (150 mM NaCl, 25 mM Tris HCl pH 7.6, 1% NP-40, 1% sodium deoxycholate, 0.1% SDS). Protein concentration was determined by bicinchoninic acid (BCA) protein assay kit (Pierce, Rockford, IL) with BSA as a standard. 80  $\mu$ g of total cellular protein was separated on 7.5% Tris-HCl polyacrylamide gels and transferred to PVDF membranes (Bio-Rad, Richmond, CA). The membranes were incubated for 1 h with 5% dry skim milk in PBST buffer (PBS containing 0.05% tween 20) to block nonspecific binding and then incubated with primary antibodies (x1000 dilution) overnight at 4 °C. The primary antibodies were: anti-human actin (goat IgG, sc.-1616/I-19, Santa Cruz Biotechnology, Santa Cruz, CA), anti-human ER $\alpha$  (rabbit IgG, sc-542/MC-20 and sc-544/G-20, Santa Cruz Biotechnology), and anti-human CSK (goat IgG, ab744-100, Abcam, Cambridge, MA). The membranes were washed with PBST and then incubated with peroxidase-conjugated secondary antibodies (donkey anti-goat IgG or goat anti-rabbit IgG, x3000 dilution, Santa Cruz Biotechnology) for 1 h at room temperature. All antibodies were diluted in 1% dry skim milk in PBST buffer. Protein bands were visualized by enhanced chemiluminescence (GE Healthcare, Piscataway, NJ) using Kodak BioMax MR films (Perkin Elmer, Waltham, MA). Signal intensities of protein bands were quantitated by densitometry from at least three independent experiments using ImageQuant system (GE Healthcare).

Phosphorylation of c-Src was examined using the Odyssey infrared imaging system (LI-COR Biosciences, Lincoln, Nebraska) as previously described [98] using rabbit anti-phosphorylated human c-Src polyclonal antibody (P-Tyr416, #2101, Cell Signaling Technology, Danvers, MA) and mouse anti-human c-Src monoclonal antibody (IgG<sub>1</sub>, sc.-32789, Santa Cruz Biotechnology) as primary antibodies. Secondary antibodies (IRDye 680 donkey anti-rabbit IgG and IRDye 800 donkey anti-mouse IgG) were purchased from LI-COR Biosciences. For c-Src kinase activity assay, c-Src protein was immunoprecipitated using the anti-human c-Src monoclonal antibody and protein G beads and subjected to the ProFluor Src family kinase assay (Promega, Madison, WI) following the manufacturer's instructions.

## ER $\alpha$ ELISA

Cell lysates were prepared with the RIPA buffer, and 100  $\mu$ g of total protein was subjected to ER $\alpha$  ELISA (Active Motif; Carlsbad, CA) following manufacturer's instructions. Absorbance at 450 nm was determined by Synergy HT plate reader (BioTek, Winooski, VT).

## Expression of CSK by transient transfection of an expression plasmid

An expression plasmid for human full-length CSK (Cat. # RC210758) and its control vector (pCMV6-ENTRY) was purchased from OriGene Technologies (Rockville, MD). The plasmid expressed an open reading frame for human CSK transcript variant 1 tagged C-terminally with the myc and DDK epitope peptides and placed under the CMV promoter. Subconfluent cells were transfected with the CSK expression plasmid or the control plasmid together with an expression plasmid for a green fluorescence protein (S65T red shift mutant of EGFP) using TransIT-LT1 transfection reagent following the manufacturer's instructions (Mirus Bio, Madison, WI). High transfection efficiency (>70%) was confirmed by expression of the EGFP observed using a fluorescence microscope.

## Statistics

Values are expressed as mean $\pm$ SEM of at least three independent experiments. One-way analysis of variance (ANOVA) was performed on the values followed by Tukey post-hoc test in GraphPad PRISM6 statistic software package (GraphPad Software, La Jolla, CA).

## Supporting Information

**Figure S1 RNAi knockdown of CSK in MCF-7 cells causes resistance to fulvestrant: Crystal violet staining data.** Cells were infected with empty lentivirus vector (pLKO.1) or two independent clones of lentiviruses expressing different shRNA species targeting CSK (CSK KD #1 and #2) and exposed to puromycin, fulvestrant, or vehicle for 7 days. (PDF)

**Figure S2 RNAi knockdown of CSK in MCF-7 cells and resistance to fulvestrant.** (A) Cells were infected with empty lentivirus vector (pLKO.1) or lentivirus clones expressing different shRNA species targeting CSK as listed in Table S1 and subjected to Western blotting quantitation of CSK protein expression. CSK-KD, CSK knockdown. (B, C) Fulvestrant resistance of MCF-7 cells infected with shRNA lentiviruses targeting CSK. Cells infected with shRNA lentiviruses were exposed to 100 nM fulvestrant or vehicle for 7 days. (B) Gross appearance of cell culture after crystal violet staining. (C) Phase contrast microscopic images. MCF-7 cells expressing CSK (MCF-7 W2 and pLKO.1 infected cells) showed massive apoptotic death after fulvestrant exposure whereas cells subjected to RNAi knockdown of CSK survived. MCF-7 cells with CSK knockdown often showed significant pileup growth appearance as shown in this picture. (PDF)

**Figure S3 RNAi knockdown of CSK does not affect MCF-7 cell sensitivity to tamoxifen or paclitaxel.** Cells were infected with empty lentivirus vector (pLKO.1) or two independent clones of lentiviruses expressing different shRNA species targeting CSK (CSK KD#1 and #2) and then exposed to 1  $\mu$ M 4-hydroxytamoxifen (4-OHT) for 10 days (A) or 1–1000 nM paclitaxel for 2 days (B). Cell viability was determined by crystal violet staining. Quantified data obtained by spectrophotometry of the stained cells are shown in Fig. 2. (PDF)

**Figure S4 Re-expression of CSK in MCF-7 cells rescues fulvestrant-induced ER $\alpha$  protein degradation.** (A) Diminished CSK protein expression in MCF-7 cells subjected to lentiviral RNAi knockdown and re-expression by transfection of a CSK expression plasmid: Western blotting. MCF-7 cells were infected with pLKO.1 control lentivirus (lane 1) or the CSK-KD#1 shRNA lentivirus (lanes 2, 3). The cells infected with the CSK-KD#1 virus were further subjected to transfection of an expression plasmid for human CSK (lane 3) or a control plasmid harboring no insert (lane 2). Expression of CSK protein was determined by Western blotting 24 hours after transfection. (B) Time-course of ER $\alpha$  protein expression in MCF-7 cells exposed to fulvestrant: Western blotting. Intensities of ER $\alpha$  protein bands were determined by densitometry (C, mean  $\pm$  SEM of three independent experiments. *Asterisk* indicates statistical significance ( $p < 0.05$ ) against the control without exposure to fulvestrant (con). *Sharp* indicates statistical significance ( $p < 0.05$ ) between CSK knockdown cells with or without re-expression of CSK1 from a plasmid. (PDF)



**Figure S5 Re-expression of CSK in MCF-7 cells rescues fulvestrant-induced ER $\alpha$  protein degradation.** (A, B) Effects of E2 and fulvestrant on proliferation and survival of T47D cells. Cells were for up to 6 days (A) or 11 days (B) in the presence or absence of E2 and/or fulvestrant in the medium, and the live cell numbers in the culture were determined by crystal violet staining. Note that live cell number was not decreased in the presence of fulvestrant even though cells were not proliferated in this condition, either. (C–E) Changes in ER $\alpha$  protein expression in T47D cells exposed to fulvestrant. T47D cells infected with pLKO.1 control lentivirus (C) or the CSK-KD#1 shRNA lentivirus targeting CSK (D) were exposed to 100 nM fulvestrant or vehicle (ethanol) for 3, 6, or 9 hours (control, no exposure) and then subjected to Western blotting determination of ER $\alpha$  protein expression. Intensities of ER $\alpha$  protein bands were determined by densitometry (E, mean  $\pm$  SEM of three independent experiments). Asterisk indicates statistical significance ( $p < 0.05$ ) against control; sharp indicates significant differences between the pLKO.1-infected and the CSK-KD#1 infected cells observed when cells were exposed to fulvestrant ( $p < 0.05$ , *t*-test). (PDF)

**Figure S6 PP1 or AZD0530 tyrosine kinase inhibitors had no effect on fulvestrant-induced cell death.** Cells were exposed to PP1 (0.1–2  $\mu$ M, A) or AZD0530 (0.1–2  $\mu$ M, B) for 30 minutes and then exposed to 100 nM fulvestrant in the presence of the same c-Src kinase inhibitors for 5 days. Cell viability was determined by crystal violet staining. Representative crystal violet staining images are shown. Amounts of stained cells were determined by spectrometry as shown in the bar graphs (mean  $\pm$  SEM of three independent experiments; asterisk indicates statistical significance  $p < 0.05$  against the vehicle control, sharp indicates significance against the absence of AZD0530). (PDF)

**Figure S7 c-Src phosphorylation and kinase activity in MCF-7 cells.** (A) Fulvestrant does not induce c-Src phosphor-

ylation. MCF-7 cells were exposed to 100 nM fulvestrant or 20 ng/ml EGF for 5, 10, and 30 minutes and subjected to Western blotting of Tyr416-phosphorylated and total c-Src. (B) Inhibition of EGF-induced c-Src Tyr-416 phosphorylation by PP1 or AZD0530. Cells were exposed to 10  $\mu$ M PP1 or 2  $\mu$ M AZT for 30 min and then stimulated with 20 ng/ml EGF for another 30 minutes. Phosphorylation of c-Src at tyr416 was determined by Western blotting. Typical images of three repeated experiments are shown for panels (A) and (B). Asterisks indicate statistical significance ( $p < 0.05$ ). (C) c-Src kinase activities in MCF-7 cells. c-Src was enriched by immunoprecipitation and subjected to kinase assay (mean  $\pm$  SEM of three experiments). 1–3, MCF-7 cells infected with pLKO.1 control lentivirus exposed to vehicle (1), 10  $\mu$ M PP1 (2), or 2  $\mu$ M AZT (3) for 30 min. 4–5, MCF-7 cells infected with CSK-KD#1 (4) or CSK-KD#2 (5) shRNA lentiviruses. (PDF)

**Table S1 The TRC collection of shRNA lentiviral clones targeting human CSK.** (PDF)

## Acknowledgments

We thank Kevin Haggis at Molecular Pathology Unit, Massachusetts General Hospital, for help to perform the Odyssey imaging of phosphorylated c-Src. We appreciate Naomi Laing, Lihua Yu, and Robert Godin of AstraZeneca Pharmaceuticals for helpful discussions. We also thank Crystal Mahoney, Sabrina Collins, Shannon Smith, and Noel Rosenthal for technical assistance.

## Author Contributions

Conceived and designed the experiments: WLY TS. Performed the experiments: WLY KS KRC DR KRM. Analyzed the data: WLY TS. Wrote the paper: WLY TS.

## References

- EBCTCG (1998) Tamoxifen for early breast cancer: an overview of the randomised trials. Early Breast Cancer Trialists' Collaborative Group. *Lancet* 351: 1451–1467.
- Butt AJ, Sutherland RL, Musgrove EA (2007) Live or let die: oestrogen regulation of survival signalling in endocrine response. *Breast Cancer Res* 9: 306.
- Lin NU, Winer EP (2008) Advances in adjuvant endocrine therapy for postmenopausal women. *J Clin Oncol* 26: 798–805.
- Jordan VC, Brodie AM (2007) Development and evolution of therapies targeted to the estrogen receptor for the treatment and prevention of breast cancer. *Steroids* 72: 7–25.
- Goldhirsch A, Wood WC, Gelber RD, Coates AS, Thurlimann B, et al. (2007) Progress and promise: highlights of the international expert consensus on the primary therapy of early breast cancer 2007. *Ann Oncol* 18: 1133–1144.
- Kurebayashi J (2007) Current clinical trials of endocrine therapy for breast cancer. *Breast Cancer* 14: 200–214.
- Utsumi T, Kobayashi N, Hanada H (2007) Recent perspectives of endocrine therapy for breast cancer. *Breast Cancer* 14: 194–199.
- Wu YL, Yang X, Ren Z, McDonnell DP, Norris JD, et al. (2005) Structural basis for an unexpected mode of SERM-mediated ER antagonism. *Mol Cell* 18: 413–424.
- Jordan VC (2006) Optimising endocrine approaches for the chemoprevention of breast cancer beyond the Study of Tamoxifen and Raloxifene (STAR) trial. *Eur J Cancer* 42: 2909–2913.
- Vogel VG, Costantino JP, Wickerham DL, Cronin WM, Cecchini RS, et al. (2006) Effects of tamoxifen vs raloxifene on the risk of developing invasive breast cancer and other disease outcomes: the NSABP Study of Tamoxifen and Raloxifene (STAR) P-2 trial. *JAMA* 295: 2727–2741.
- Howell A (2006) Pure oestrogen antagonists for the treatment of advanced breast cancer. *Endocr Relat Cancer* 13: 689–706.
- Cook KL, Shajahan AN, Clarke R (2011) Autophagy and endocrine resistance in breast cancer. *Expert review of anticancer therapy* 11: 1283–1294.
- Coser KR, Chesnes J, Hur J, Ray S, Isselbacher KJ, et al. (2003) Global analysis of ligand sensitivity of estrogen inducible and suppressible genes in MCF7/BUS breast cancer cells by DNA microarray. *Proc Natl Acad Sci U S A* 100: 13994–13999.
- Madak-Erdogan Z, Kieser KJ, Kim SH, Komm B, Katzenellenbogen JA, et al. (2008) Nuclear and Extracellular Pathway Inputs in the Regulation of Global Gene Expression by Estrogen Receptors. *Mol Endocrinol*.
- Frasor J, Danes JM, Komm B, Chang KC, Lyttle CR, et al. (2003) Profiling of estrogen up- and down-regulated gene expression in human breast cancer cells: insights into gene networks and pathways underlying estrogenic control of proliferation and cell phenotype. *Endocrinology* 144: 4562–4574.
- Bjornstrom L, Sjoberg M (2005) Mechanisms of estrogen receptor signaling: convergence of genomic and nongenomic actions on target genes. *Mol Endocrinol* 19: 833–842.
- Kahlert S, Nuedling S, van Eickels M, Vetter H, Meyer R, et al. (2000) Estrogen receptor alpha rapidly activates the IGF-1 receptor pathway. *J Biol Chem* 275: 18447–18453.
- Razandi M, Alton G, Pedram A, Ghonshani S, Webb P, et al. (2003) Identification of a structural determinant necessary for the localization and function of estrogen receptor alpha at the plasma membrane. *Mol Cell Biol* 23: 1633–1646.
- Chung YL, Sheu ML, Yang SC, Lin CH, Yen SH (2002) Resistance to tamoxifen-induced apoptosis is associated with direct interaction between Her2/neu and cell membrane estrogen receptor in breast cancer. *Int J Cancer* 97: 306–312.
- Migliaccio A, Castoria G, Di Domenico M, De Falco A, Bilancio A, et al. (2002) Src is an initial target of sex steroid hormone action. *Ann N Y Acad Sci* 963: 185–190.
- Song RX, McPherson RA, Adam L, Bao Y, Shupnik M, et al. (2002) Linkage of rapid estrogen action to MAPK activation by ERalpha-Shc association and Shc pathway activation. *Mol Endocrinol* 16: 116–127.
- Gururaj AE, Rayala SK, Vadlamudi RK, Kumar R (2006) Novel mechanisms of resistance to endocrine therapy: genomic and nongenomic considerations. *Clin Cancer Res* 12: 1001s–1007s.

23. Vadlamudi RK, Bagheri-Yarmand R, Yang Z, Balasenthil S, Nguyen D, et al. (2004) Dynein light chain 1, a p21-activated kinase 1-interacting substrate, promotes cancerous phenotypes. *Cancer Cell* 5: 575–585.
24. Rayala SK, den Hollander P, Balasenthil S, Yang Z, Broaddus RR, et al. (2005) Functional regulation of oestrogen receptor pathway by the dynein light chain 1. *EMBO Rep* 6: 538–544.
25. Vadlamudi RK, Manavathi B, Balasenthil S, Nair SS, Yang Z, et al. (2005) Functional implications of altered subcellular localization of PELP1 in breast cancer cells. *Cancer Res* 65: 7724–7732.
26. Wong CW, McNally C, Nickbarg E, Komm BS, Cheskis BJ (2002) Estrogen receptor-interacting protein that modulates its nongenomic activity-crosstalk with Src/Erk phosphorylation cascade. *Proc Natl Acad Sci U S A* 99: 14783–14788.
27. Sun M, Paciga JE, Feldman RI, Yuan Z, Coppola D, et al. (2001) Phosphatidylinositol-3-OH Kinase (PI3K)/AKT2, activated in breast cancer, regulates and is induced by estrogen receptor alpha (ERalpha) via interaction between ERalpha and PI3K. *Cancer Res* 61: 5985–5991.
28. Santen RJ, Song RX, Zhang Z, Yue W, Kumar R (2004) Adaptive hypersensitivity to estrogen: mechanism for sequential responses to hormonal therapy in breast cancer. *Clin Cancer Res* 10: 337S–345S.
29. Ning Y, Riggins RB, Mulla JE, Chung H, Zwart A, et al. (2010) IFN $\gamma$  restores breast cancer sensitivity to fulvestrant by regulating STAT1, IFN regulatory factor 1, NF-kappaB, BCL2 family members, and signaling to caspase-dependent apoptosis. *Molecular cancer therapeutics* 9: 1274–1285.
30. Iorns E, Turner NC, Elliott R, Syed N, Garrone O, et al. (2008) Identification of CDK10 as an important determinant of resistance to endocrine therapy for breast cancer. *Cancer Cell* 13: 91–104.
31. Hur J, Bell DW, Dean KL, Coser KR, Hilario PC, et al. (2006) Regulation of expression of BIK proapoptotic protein in human breast cancer cells: p53-dependent induction of BIK mRNA by fulvestrant and proteasomal degradation of BIK protein. *Cancer Res* 66: 10153–10161.
32. Hur J, Chesnes J, Coser KR, Lee RS, Geck P, et al. (2004) The Bik BH3-only protein is induced in estrogen-starved and antiestrogen-exposed breast cancer cells and provokes apoptosis. *Proc Natl Acad Sci U S A* 101: 2351–2356.
33. Moffat J, Gruenberg DA, Yang X, Kim SY, Kloepfer AM, et al. (2006) A lentiviral RNAi library for human and mouse genes applied to an arrayed viral high-content screen. *Cell* 124: 1283–1298.
34. Moffat J, Sabatini DM (2006) Building mammalian signalling pathways with RNAi screens. *Nat Rev Mol Cell Biol* 7: 177–187.
35. Coser KR, Wittner BS, Rosenthal NF, Collins SC, Melas A, et al. (2009) Antiestrogen-resistant subclones of MCF-7 human breast cancer cells are derived from a common monoclonal drug-resistant progenitor. *Proc Natl Acad Sci U S A* 106: 14536–14541.
36. Brunner N, Boysen B, Jirus S, Skaar TC, Holst-Hansen C, et al. (1997) MCF7/LCC9: an antiestrogen-resistant MCF-7 variant in which acquired resistance to the steroidal antiestrogen ICI 182,780 confers an early cross-resistance to the nonsteroidal antiestrogen tamoxifen. *Cancer research* 57: 3486–3493.
37. Howell A, Robertson J (1995) Response to a specific antiestrogen (ICI 182780) in tamoxifen-resistant breast cancer. *Lancet* 345: 989–990.
38. Borgna JL, Rochefort H (1980) High-affinity binding to the estrogen receptor of [3H]4-hydroxytamoxifen, an active antiestrogen metabolite. *Molecular and cellular endocrinology* 20: 71–85.
39. Howell A, Robertson JF, Abram P, Lichinitser MR, Elledge R, et al. (2004) Comparison of fulvestrant versus tamoxifen for the treatment of advanced breast cancer in postmenopausal women previously untreated with endocrine therapy: a multinational, double-blind, randomized trial. *J Clin Oncol* 22: 1605–1613.
40. Diel P, Smolnikar K, Michna H (1999) The pure antiestrogen ICI 182780 is more effective in the induction of apoptosis and down regulation of BCL-2 than tamoxifen in MCF-7 cells. *Breast Cancer Res Treat* 58: 87–97.
41. Rowinsky EK, Donehower RC (1995) Paclitaxel (taxol). *N Engl J Med* 332: 1004–1014.
42. Powers GL, Ellison-Zelski SJ, Casa AJ, Lee AV, Alarid ET (2010) Proteasome inhibition represses ERalpha gene expression in ER+ cells: a new link between proteasome activity and estrogen signaling in breast cancer. *Oncogene* 29: 1509–1518.
43. Fan M, Nakshatri H, Nephew KP (2004) Inhibiting proteasomal proteolysis sustains estrogen receptor-alpha activation. *Mol Endocrinol* 18: 2603–2615.
44. Lonard DM, Nawaz Z, Smith CL, O'Malley BW (2000) The 26S proteasome is required for estrogen receptor-alpha and coactivator turnover and for efficient estrogen receptor-alpha transactivation. *Mol Cell* 5: 939–948.
45. Seibert K, Shafie SM, Triche TJ, Whang-Peng JJ, O'Brien SJ, et al. (1983) Clonal variation of MCF-7 breast cancer cells in vitro and in athymic nude mice. *Cancer Res* 43: 2223–2239.
46. Whang-Peng J, Lee EC, Kao-Shan CS, Seibert K, Lippman M (1983) Cytogenetic studies of human breast cancer lines: MCF-7 and derived variant sublines. *J Natl Cancer Inst* 71: 687–695.
47. Osborne CK, Hobbs K, Trent JM (1987) Biological differences among MCF-7 human breast cancer cell lines from different laboratories. *Breast Cancer Res Treat* 9: 111–121.
48. Levenson AS, Jordan VC (1997) MCF-7: the first hormone-responsive breast cancer cell line. *Cancer Res* 57: 3071–3078.
49. Nugoli M, Chuchana P, Vendrell J, Orsetti B, Ursule L, et al. (2003) Genetic variability in MCF-7 sublines: evidence of rapid genomic and RNA expression profile modifications. *BMC Cancer* 3: 13.
50. Jones C, Payne J, Wells D, Delhanty JD, Lakhani SR, et al. (2000) Comparative genomic hybridization reveals extensive variation among different MCF-7 cell stocks. *Cancer Genet Cytogenet* 117: 153–158.
51. Berkers CR, Verdoes M, Lichtman E, Fiebigler E, Kessler BM, et al. (2005) Activity probe for in vivo profiling of the specificity of proteasome inhibitor bortezomib. *Nature methods* 2: 357–362.
52. Ishii Y, Papa L, Bahadur U, Yue Z, Aguirre-Ghiso J, et al. (2011) Bortezomib enhances the efficacy of fulvestrant by amplifying the aggregation of the estrogen receptor, which leads to a proapoptotic unfolded protein response. *Clinical cancer research: an official journal of the American Association for Cancer Research* 17: 2292–2300.
53. Stenoien DL, Patel K, Mancini MG, Dutertre M, Smith CL, et al. (2001) FRAP reveals that mobility of oestrogen receptor-alpha is ligand- and proteasome-dependent. *Nature cell biology* 3: 15–23.
54. Shang Y, Brown M (2002) Molecular determinants for the tissue specificity of SERMs. *Science* 295: 2465–2468.
55. Shah YM, Rowan BG (2005) The Src kinase pathway promotes tamoxifen agonist action in Ishikawa endometrial cells through phosphorylation-dependent stabilization of estrogen receptor (alpha) promoter interaction and elevated steroid receptor coactivator 1 activity. *Mol Endocrinol* 19: 732–748.
56. Lacroix M, Leclercq G (2004) Relevance of breast cancer cell lines as models for breast tumours: an update. *Breast Cancer Res Treat* 83: 249–289.
57. Ia KK, Mills RD, Hossain MI, Chan KC, Jarasrassamee B, et al. (2010) Structural elements and allosteric mechanisms governing regulation and catalysis of CSK-family kinases and their inhibition of Src-family kinases. *Growth factors* 28: 329–350.
58. Rengifo-Cam W, Konishi A, Morishita N, Matsuoka H, Yamori T, et al. (2004) Csk defines the ability of integrin-mediated cell adhesion and migration in human colon cancer cells: implication for a potential role in cancer metastasis. *Oncogene* 23: 289–297.
59. Varricchio L, Migliaccio A, Castoria G, Yamaguchi H, de Falco A, et al. (2007) Inhibition of estradiol receptor/Src association and cell growth by an estradiol receptor alpha tyrosine-phosphorylated peptide. *Mol Cancer Res* 5: 1213–1221.
60. Migliaccio A, Varricchio L, De Falco A, Castoria G, Arra C, et al. (2007) Inhibition of the SH3 domain-mediated binding of Src to the androgen receptor and its effect on tumor growth. *Oncogene* 26: 6619–6629.
61. Castoria G, Giovannelli P, Lombardi M, De Rosa C, Giraldi T, et al. (2012) Tyrosine phosphorylation of estradiol receptor by Src regulates its hormone-dependent nuclear export and cell cycle progression in breast cancer cells. *Oncogene*.
62. Migliaccio A, Di Domenico M, Castoria G, Nanayakkara M, Lombardi M, et al. (2005) Steroid receptor regulation of epidermal growth factor signaling through Src in breast and prostate cancer cells: steroid antagonist action. *Cancer Res* 65: 10585–10593.
63. Migliaccio A, Castoria G, Di Domenico M, Ciociola A, Lombardi M, et al. (2006) Crosstalk between EGFR and extranuclear steroid receptors. *Ann N Y Acad Sci* 1089: 194–200.
64. Shupnik MA (2004) Crosstalk between steroid receptors and the c-Src-receptor tyrosine kinase pathways: implications for cell proliferation. *Oncogene* 23: 7979–7989.
65. Tatton L, Morley GM, Chopra R, Khwaja A (2003) The Src-selective tyrosine inhibitor PPI also inhibits Kit and Bcr-Abl tyrosine kinases. *J Biol Chem* 278: 4847–4853.
66. Finn RS (2008) Targeting Src in breast cancer. *Ann Oncol* 19: 1379–1386.
67. Hennequin LF, Allen J, Breed J, Curwen J, Fennell M, et al. (2006) N-(5-chloro-1,3-benzodioxol-4-yl)-7-[2-(4-methylpiperazin-1-yl)ethoxy]-5- (tetrahydro-2H-pyran-4-yloxy)quinazolin-4-amine, a novel, highly selective, orally available, dual-specific c-Src/Abl kinase inhibitor. *J Med Chem* 49: 6465–6488.
68. Chang YM, Bai L, Liu S, Yang JC, Kung HJ, et al. (2008) Src family kinase oncogenic potential and pathways in prostate cancer as revealed by AZD0530. *Oncogene* 27: 6365–6375.
69. Baselga J, Cervantes A, Martinelli E, Chirivella I, Hoekman K, et al. (2010) Phase I safety, pharmacokinetics, and inhibition of SRC activity study of saracatinib in patients with solid tumors. *Clin Cancer Res* 16: 4876–4883.
70. Nagata Y, Lan KH, Zhou X, Tan M, Esteva FJ, et al. (2004) PTEN activation contributes to tumor inhibition by trastuzumab, and loss of PTEN predicts trastuzumab resistance in patients. *Cancer Cell* 6: 117–127.
71. Gonfloni S, Weijland A, Kretzschmar J, Superti-Furga G (2000) Crosstalk between the catalytic and regulatory domains allows bidirectional regulation of Src. *Nat Struct Biol* 7: 281–286.
72. Sabe H, Okada M, Nakagawa H, Hanafusa H (1992) Activation of c-Src in cells bearing v-Crk and its suppression by Csk. *Mol Cell Biol* 12: 4706–4713.
73. Sabe H, Knudsen B, Okada M, Nada S, Nakagawa H, et al. (1992) Molecular cloning and expression of chicken C-terminal Src kinase: lack of stable association with c-Src protein. *Proc Natl Acad Sci U S A* 89: 2190–2194.
74. Valley CC, Metivier R, Solodin NM, Fowler AM, Mashek MT, et al. (2005) Differential regulation of estrogen-inducible proteolysis and transcription by the estrogen receptor alpha N terminus. *Molecular and cellular biology* 25: 5417–5428.
75. Callige M, Richard-Foy H (2006) Ligand-induced estrogen receptor alpha degradation by the proteasome: new actors? *Nuclear receptor signaling* 4: e004.
76. Nirmala PB, Thampan RV (1995) Ubiquitination of the rat uterine estrogen receptor: dependence on estradiol. *Biochem Biophys Res Commun* 213: 24–31.

77. Nawaz Z, Lonard DM, Dennis AP, Smith CL, O'Malley BW (1999) Proteasome-dependent degradation of the human estrogen receptor. *Proc Natl Acad Sci U S A* 96: 1858–1862.
78. Alarid ET, Bakopoulos N, Solodin N (1999) Proteasome-mediated proteolysis of estrogen receptor: a novel component in autologous down-regulation. *Mol Endocrinol* 13: 1522–1534.
79. Reid G, Hubner MR, Metivier R, Brand H, Denger S, et al. (2003) Cyclic, proteasome-mediated turnover of unliganded and liganded ERalpha on responsive promoters is an integral feature of estrogen signaling. *Mol Cell* 11: 695–707.
80. Wijayaratne AL, McDonnell DP (2001) The human estrogen receptor-alpha is a ubiquitinated protein whose stability is affected differentially by agonists, antagonists, and selective estrogen receptor modulators. *J Biol Chem* 276: 35684–35692.
81. Chu I, Arnaout A, Loiseau S, Sun J, Seth A, et al. (2007) Src promotes estrogen-dependent estrogen receptor alpha proteolysis in human breast cancer. *J Clin Invest* 117: 2205–2215.
82. Marsaud V, Gougelet A, Maillard S, Renoir JM (2003) Various phosphorylation pathways, depending on agonist and antagonist binding to endogenous estrogen receptor alpha (ERalpha), differentially affect ERalpha extractability, proteasome-mediated stability, and transcriptional activity in human breast cancer cells. *Molecular endocrinology* 17: 2013–2027.
83. Lacroix M, Toillon RA, Leclercq G (2006) p53 and breast cancer, an update. *Endocr Relat Cancer* 13: 293–325.
84. Long X, Nephew KP (2006) Fulvestrant (ICI 182,780)-dependent interacting proteins mediate immobilization and degradation of estrogen receptor-alpha. *J Biol Chem* 281: 9607–9615.
85. Long X, Fan M, Nephew KP (2010) Estrogen receptor-alpha-interacting cytochromes potentiate the antiestrogenic activity of fulvestrant. *Cancer biology & therapy* 9: 389–396.
86. Kocanova S, Mazaheri M, Caze-Subra S, Bystricky K (2010) Ligands specify estrogen receptor alpha nuclear localization and degradation. *BMC cell biology* 11: 98.
87. Fan M, Bigsby RM, Nephew KP (2003) The NEDD8 pathway is required for proteasome-mediated degradation of human estrogen receptor (ER)-alpha and essential for the antiproliferative activity of ICI 182,780 in ERalpha-positive breast cancer cells. *Molecular endocrinology* 17: 356–365.
88. Tsai HW, Katzenellenbogen JA, Katzenellenbogen BS, Shupnik MA (2004) Protein kinase A activation of estrogen receptor alpha transcription does not require proteasome activity and protects the receptor from ligand-mediated degradation. *Endocrinology* 145: 2730–2738.
89. Nicholson RI, Gee JM, Knowlden J, McClelland R, Madden TA, et al. (2003) The biology of antihormone failure in breast cancer. *Breast cancer research and treatment* 80 Suppl 1: S29-34; discussion S35.
90. Nicholson RI, Hutcheson IR, Knowlden JM, Jones HE, Harper ME, et al. (2004) Nonendocrine pathways and endocrine resistance: observations with antiestrogens and signal transduction inhibitors in combination. *Clinical cancer research: an official journal of the American Association for Cancer Research* 10: 346S–354S.
91. Hiscox S, Jordan NJ, Jiang W, Harper M, McClelland R, et al. (2006) Chronic exposure to fulvestrant promotes overexpression of the c-Met receptor in breast cancer cells: implications for tumour-stroma interactions. *Endocrine-related cancer* 13: 1085–1099.
92. McClelland RA, Barrow D, Madden TA, Dutkowski CM, Pamment J, et al. (2001) Enhanced epidermal growth factor receptor signaling in MCF7 breast cancer cells after long-term culture in the presence of the pure antiestrogen ICI 182,780 (Faslodex). *Endocrinology* 142: 2776–2788.
93. Zhu F, Choi BY, Ma WY, Zhao Z, Zhang Y, et al. (2006) COOH-terminal Src kinase-mediated c-Jun phosphorylation promotes c-Jun degradation and inhibits cell transformation. *Cancer research* 66: 5729–5736.
94. D'Arco M, Giniatullin R, Leone V, Carloni P, Birsa N, et al. (2009) The C-terminal Src inhibitory kinase (Csk)-mediated tyrosine phosphorylation is a novel molecular mechanism to limit P2X3 receptor function in mouse sensory neurons. *The Journal of biological chemistry* 284: 21393–21401.
95. Villalobos M, Olea N, Brotons JA, Olea-Serrano MF, Ruiz de Almodovar JM, et al. (1995) The E-screen assay: a comparison of different MCF7 cell stocks. *Environ Health Perspect* 103: 844–850.
96. Soto AM, Sonnenschein C, Chung KL, Fernandez MF, Olea N, et al. (1995) The E-SCREEN assay as a tool to identify estrogens: an update on estrogenic environmental pollutants. *Environ Health Perspect* 103 Suppl 7: 113–122.
97. Yahata T, Shao W, Endoh H, Hur J, Coser KR, et al. (2001) Selective coactivation of estrogen-dependent transcription by CITED1 CBP/p300-binding protein. *Genes Dev* 15: 2598–2612.
98. Ackah E, Yu J, Zoellner S, Iwakiri Y, Skurk C, et al. (2005) Akt1/protein kinase Balpha is critical for ischemic and VEGF-mediated angiogenesis. *J Clin Invest* 115: 2119–2127.
