# Supplementary material for: Fulvestrant-Induced Cell Death and Proteasomal Degradation of Estrogen Receptor α Protein in MCF-7 Cells Require the CSK c-Src Tyrosine Kinase
Source: PubMed Central journal article supplement (PMC3617152; doi:10.1371/journal.pone.0060889), 2013-04-04

**CSK Knockdown**

**mock**

**pLKO.1**

**#1**

**#2**

**Puromycin  
(2.5  $\mu$ g/ml)**

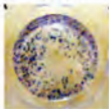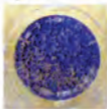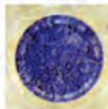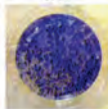

**vehicle  
(0.1% EtOH)**

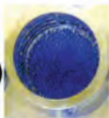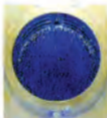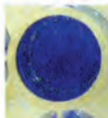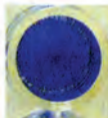

**Fulvestrant  
(100 nM)**

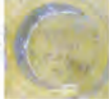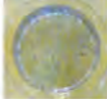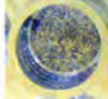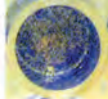

Supplement: pone.0060889.s001.pdf [file pone.0060889.s001.pdf]
