# Supplementary material for: Fulvestrant-Induced Cell Death and Proteasomal Degradation of Estrogen Receptor α Protein in MCF-7 Cells Require the CSK c-Src Tyrosine Kinase
Source: PubMed Central journal article supplement (PMC3617152; doi:10.1371/journal.pone.0060889), 2013-04-04

A

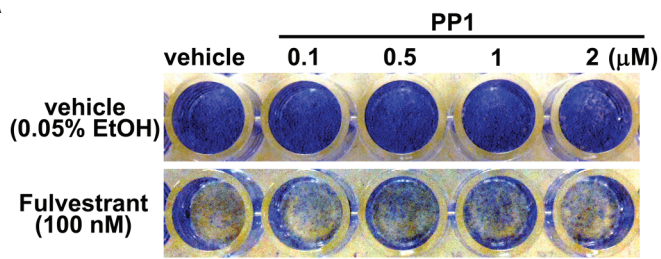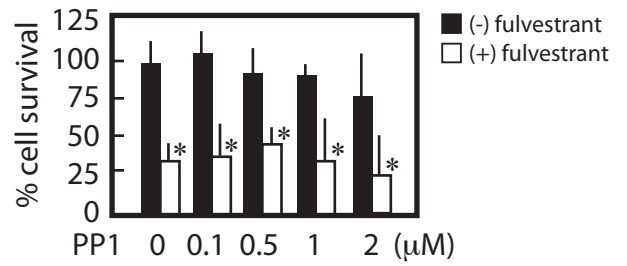

B

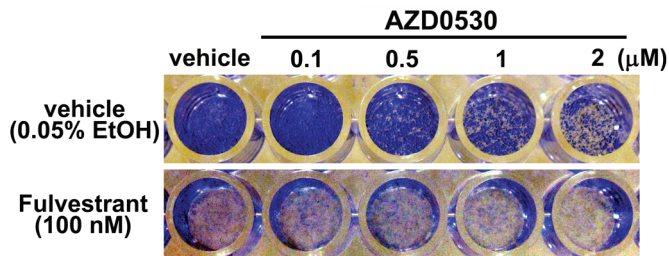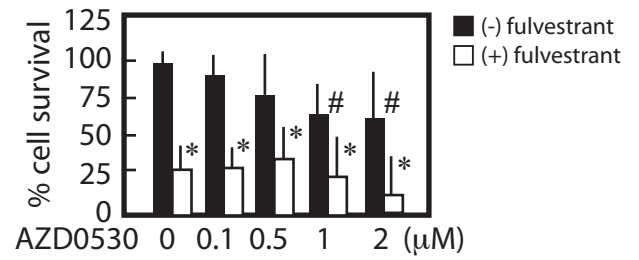

Supplement: pone.0060889.s006.pdf [file pone.0060889.s006.pdf]
