# Supplementary material for: Fulvestrant-Induced Cell Death and Proteasomal Degradation of Estrogen Receptor α Protein in MCF-7 Cells Require the CSK c-Src Tyrosine Kinase
Source: PubMed Central journal article supplement (PMC3617152; doi:10.1371/journal.pone.0060889), 2013-04-04
Supplement: pone.0060889.s008.pdf [file pone.0060889.s008.pdf]

Table S1. The TRC collection of shRNA lentiviral clones targeting human CSK

| Plate: AAT74_CLO |        |                      |                |        |                         |              |             |
|------------------|--------|----------------------|----------------|--------|-------------------------|--------------|-------------|
| Row              | Column | Clone Name           | Clone ID       | Region | Target Sequence         | Clone Status | Validation* |
| D                | 5      | NM_004383.1-1503s1c1 | TRCN0000199018 | CDS    | CCACTAAGTCTGACGTGTGGA   | cloned       | 32%         |
| D                | 6      | NM_004383.1-592s1c1  | TRCN0000199842 | CDS    | CCCAGCCAACACTACGTCCAGAA | cloned       | 36%         |
| D                | 7      | NM_004383.1-1916s1c1 | TRCN0000199031 | 3UTR   | CCGTCTCTCTTGACCCACCT    | cloned       | 45%         |
| D                | 8      | NM_004383.1-1648s1c1 | TRCN0000199500 | CDS    | GCCCGCAGTCTATGAAGTCAT   | cloned       | 9%          |
| D                | 9      | NM_004383.1-1538s1c1 | TRCN0000195031 | CDS    | CTCTGGGAAATCTACTCCTTT   | cloned       | 26%         |
| Plate: VAL02_CLO |        |                      |                |        |                         |              |             |
| Row              | Column | Clone Name           | Clone ID       | Region | Target Sequence         | Clone Status | Validation* |
| C                | 12     | NM_004383.x-1057s1c1 | TRCN0000009996 | CDS    | AGGGAACAAAGTCGCCGTCAA   | cloned       | 37%         |
| D                | 1      | NM_004383.x-1077s1c1 | TRCN0000010003 | CDS    | AGTGCAITTAAGAACGACGCCA  | cloned       | 84%         |
| D                | 2      | NM_004383.x-633s1c1  | TRCN0000010007 | CDS    | GTACCAAACCTCAGCCTCATGC  | cloned       | 17%         |
| D                | 3      | NM_004383.x-876s1c1  | TRCN0000010008 | CDS    | ACTACACCTCAGACGCAGATG   | cloned       | 10%         |
| D                | 4      | NM_004383.x-903s1c1  | TRCN0000010009 | CDS    | GTACGCGCCTCATTAACCAA    | cloned       | 13%         |
